# Supplementary material for: The effect of oxide acidity on HMF etherification
Source: Royal Society of Chemistry journal article supplement (doi:10.1039/c4cy00563e), 2014-01-01
Supplement: c4cy00563e1.pdf [file c4cy00563e1.pdf]

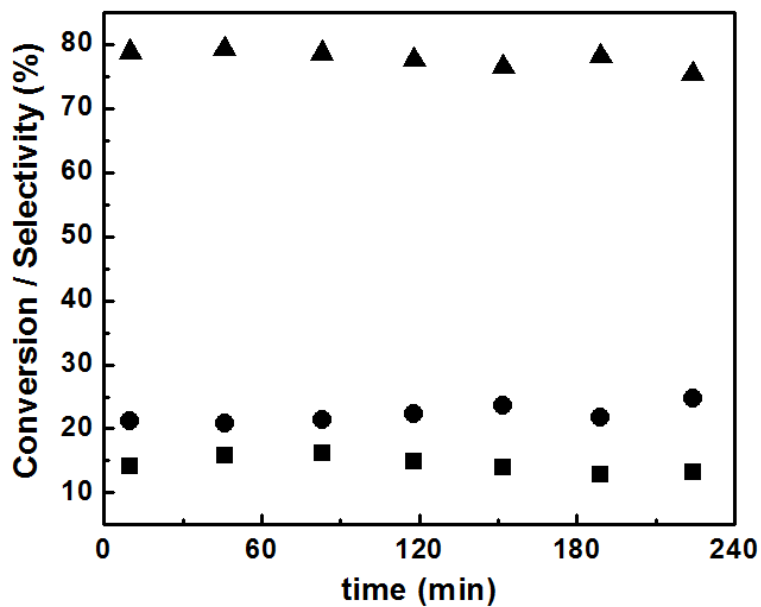

Figure S1. Transient activity of HMF reductive etherification over 10%wt ZrO<sub>2</sub>/SBA-15 at 423 K: (■) conversion, (▲) MEFA selectivity, (□) BEF selectivity.

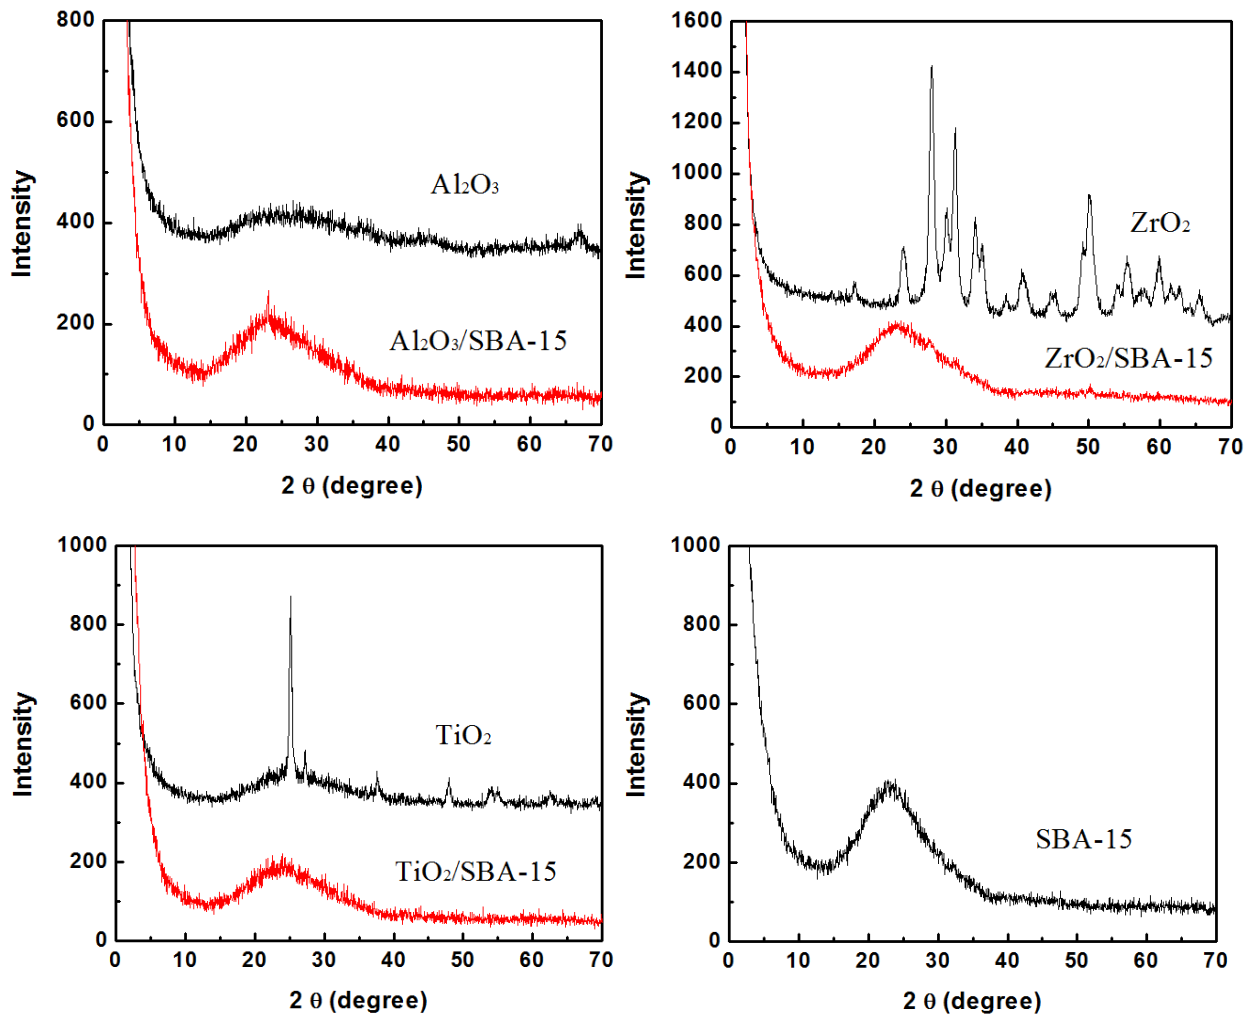

Figure S2. XRD spectra of metal oxide catalysts and SBA-15.
